# Supplementary material for: Transcriptome and GWAS Analyses Reveal Candidate Gene for Root Traits of Alfalfa during Germination under Salt Stress
Source: MDPI journal article supplement (doi:10.3390/ijms24076271), 2023-03-27
Supplement: s1 [file s1]

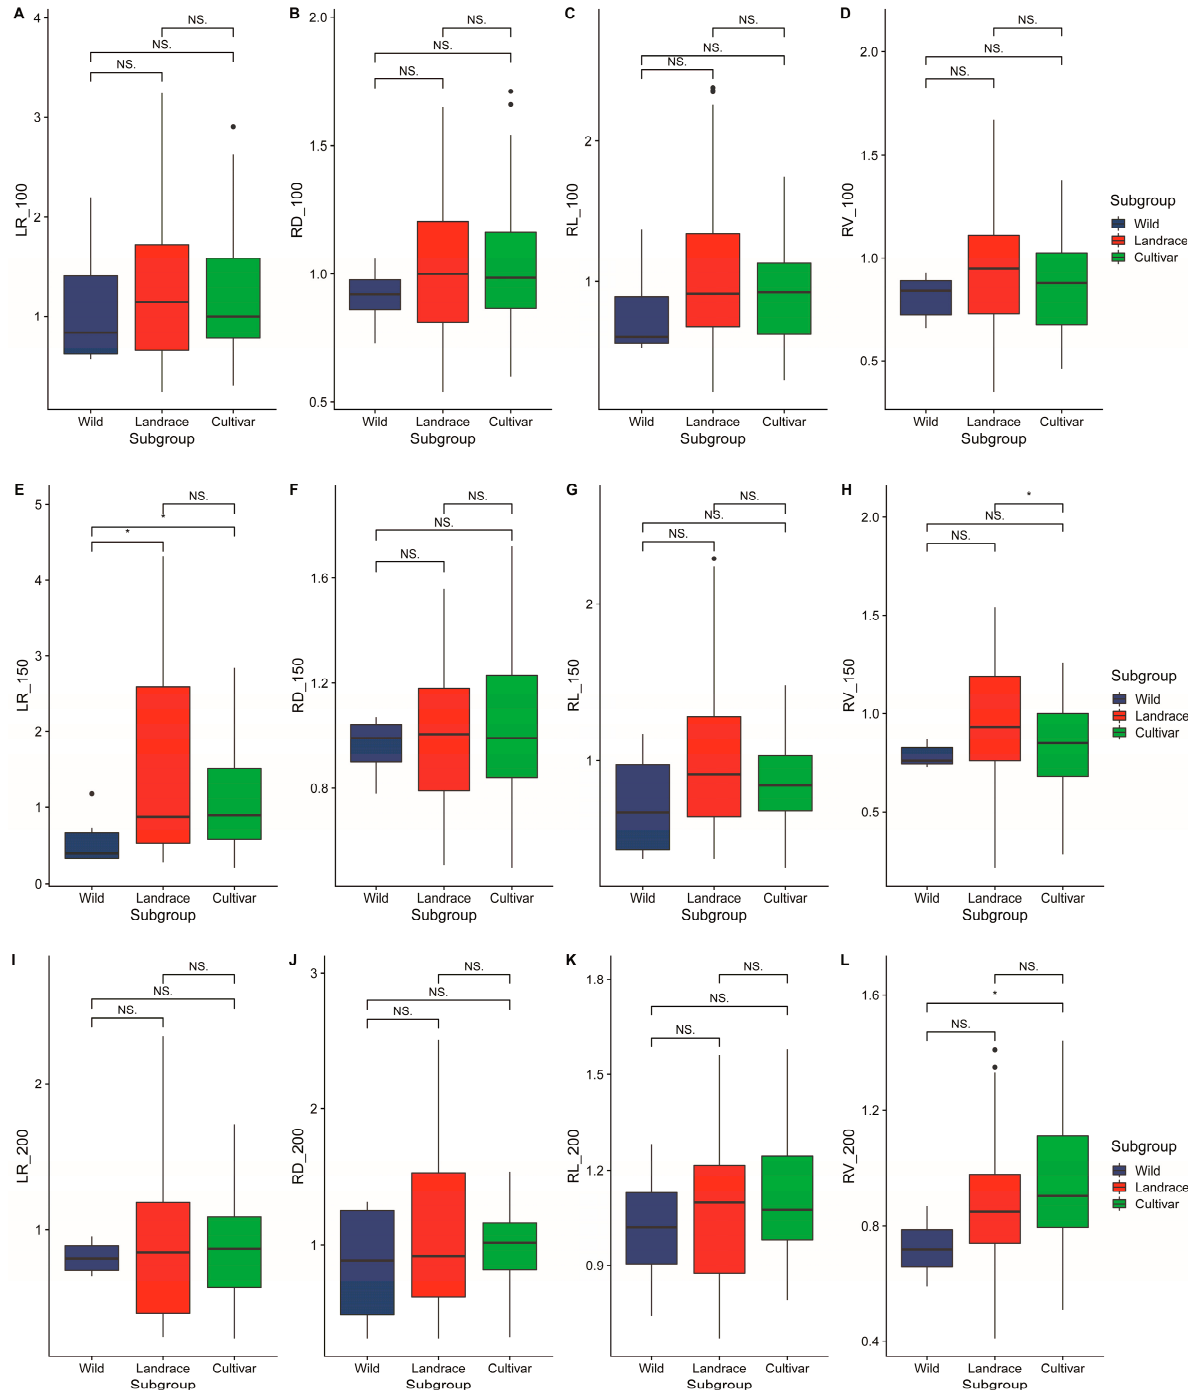

**Figure S1.** Box plot of the tolerance to the salt stress among subgroup (Wild, Landrace and Cultivar) under three salt concentrations according to breeding status. A-D: Boxplot of each root character at 100mM salt concentrations. E-H: Boxplot of each root character at 150mM salt concentrations. I-L: Boxplot of each root character at 200mM salt concentrations. \*, indicate significance at  $p < 0.05$ .

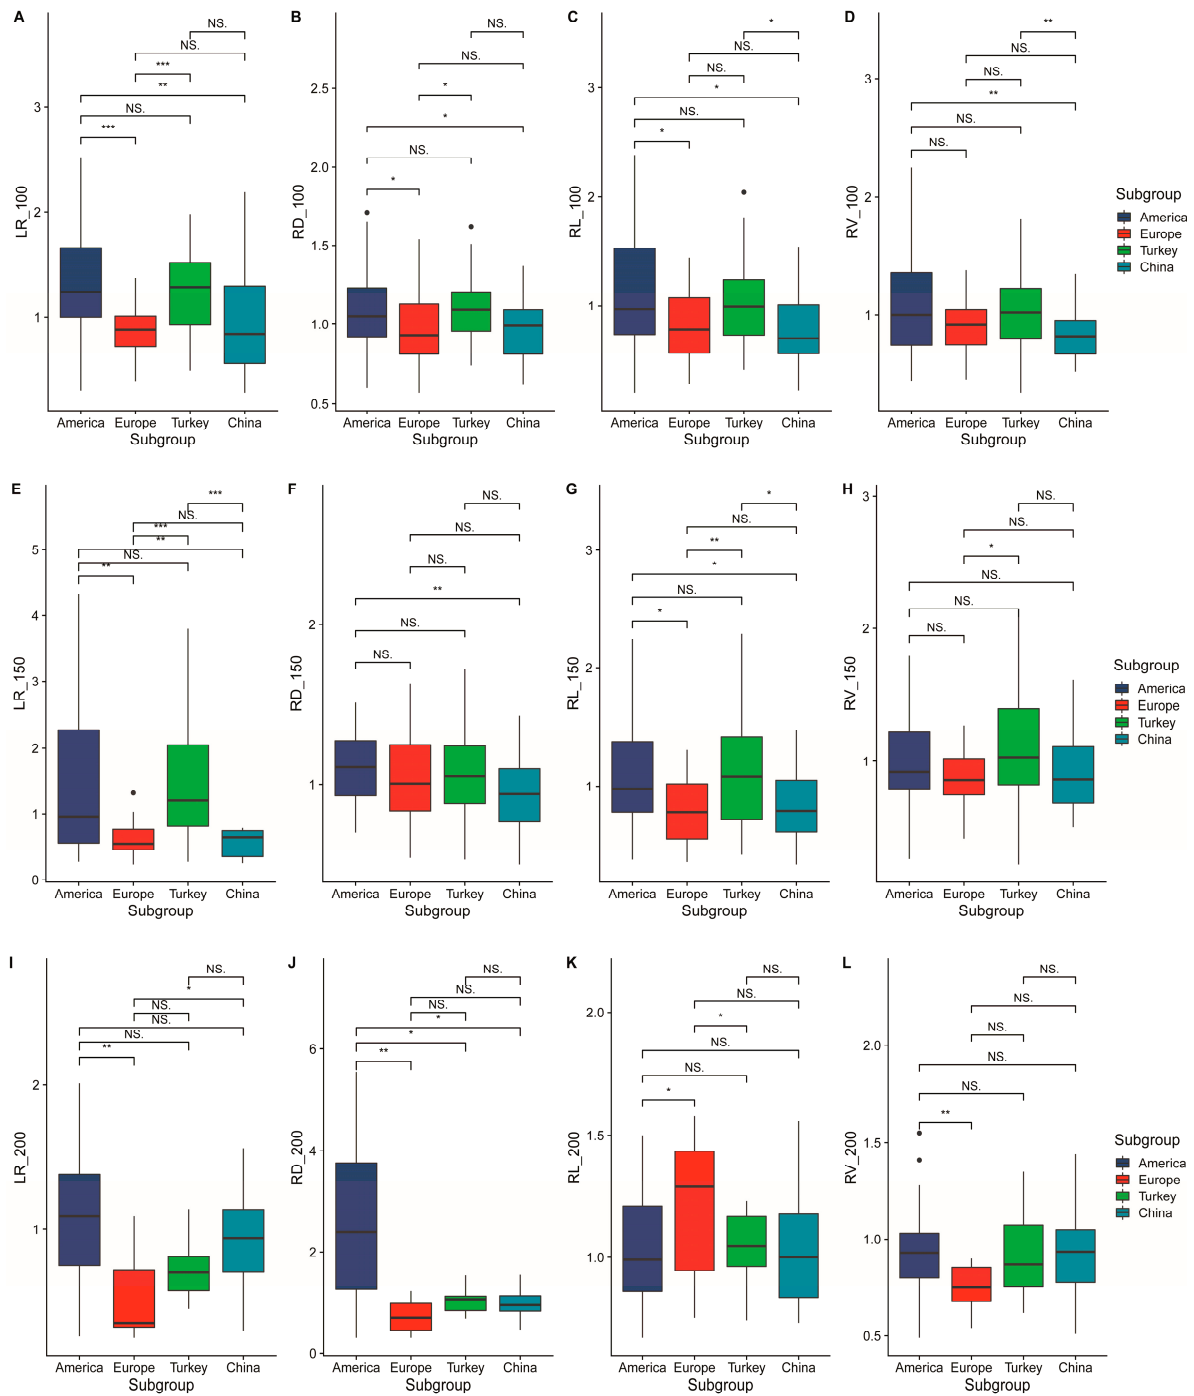

**Figure S2.** Box plot of the tolerance to the salt stress among subgroup (Europe, Asia, America and Africa) under three salt concentrations according to geographical origin. A-D: Boxplot of each root character at 100mM salt concentrations. E-H: Boxplot of each root character at 150mM salt concentrations. I-L: Boxplot of each root character at 200mM salt concentrations. \*, \*\*, and \*\*\* indicate significance at  $p < 0.05$ ,  $p < 0.01$ , and  $p < 0.001$ , respectively.

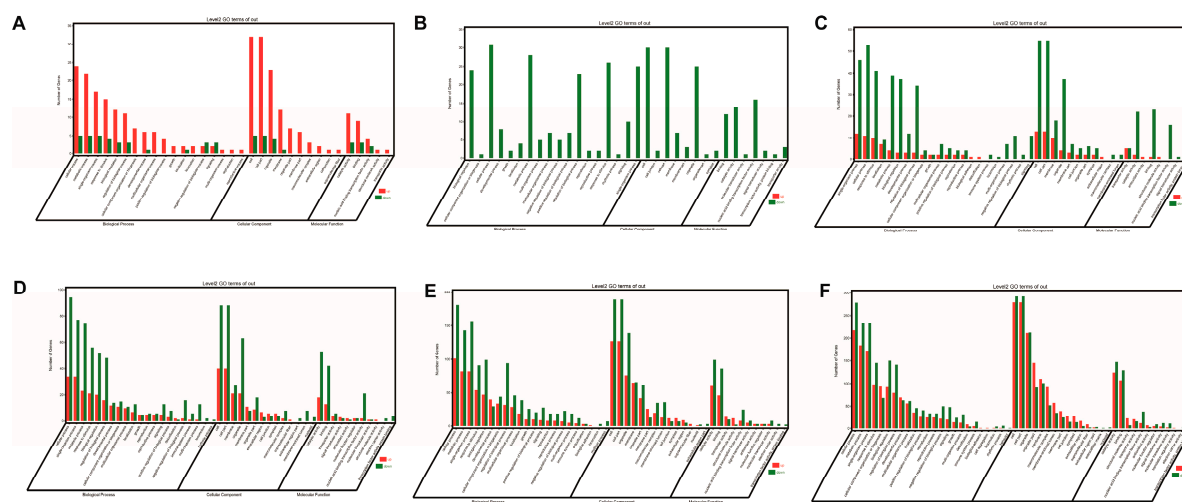

**Figure S3.** GO analysis of all DEGs. A–F: GO analysis of the Salt1 - Salt6.
